# Supplementary material
Source: PubMed Central journal article supplement (PMC3409309)
Supplement: NIHMS379617-supplement-01.pdf [file NIHMS379617-supplement-01.pdf]

610 **Supplemental Tables**611 **Supplemental Table 1.** Primers used for qPCR analysis in rhesus monkey GV

612 oocytes and granulosa cells for 19 PDE and endogenous reference genes.

| <i>Gene (source)</i>         | <i>GenBank Accession No.</i> | <i>Sequence</i>                                        |
|------------------------------|------------------------------|--------------------------------------------------------|
| <i>PDE1A</i> (human)         | NM_001003683.1               | 5'-GCAGACATCAGCCACCCAGCC<br>3'-AGGTCCACTGCTGCAAGGGAGT  |
| <i>PDE1B</i> (rhesus monkey) | XM_001110208.1               | 5-GGAGCCCAAAGCTCGGCTGG<br>3'-AAGGCACGGCATCTGACCGC      |
| <i>PDE1C</i> (rhesus monkey) | XM_001083624.1               | 5'-GTGCAGGCTGGGATATTTGT<br>3'-GCAGAAATGGGGATCTTGAA     |
| <i>PDE2A</i> (rhesus monkey) | NM_001130826.1               | 5'-CCGTGCTCACCAGCACCCCTG<br>3'-GTCCCGCGATGCCCTGATCG    |
| <i>PDE3A</i> (rhesus monkey) | XM_001096963.1               | 5'-ATTTTCATGCTTTGGAGATTGG<br>3'-TCTTCATTTGGTGCTGGTGCTT |
| <i>PDE3B</i> (rhesus monkey) | XM_001092891.1               | 5'-TGGACCAATGGCTGCTGGCT<br>3'-GCCAGGAACTGGCCGTGTTGT    |
| <i>PDE4A</i> (rhesus monkey) | XR_012597.1                  | 5'-CCCCTGTCTGCAAGGCCACG<br>3'-GAGCGGCCTCCGGCGTAATC     |
| <i>PDE4B</i> (rhesus human)  | NM_001037339.1               | 5'-GAGCCTGCTGGCAGACCTGA<br>3'-AATCGGCCCCCAGCAACAGC     |
| <i>PDE4C</i> (rhesus monkey) | XR_014365.1                  | 5'-TGGCTGCCCTCTTCGCAAGC<br>3'-AATCTGTCAGGCCCGCCCCA     |
| <i>PDE4D</i> (rhesus monkey) | XM_001101097.1               | 5'-CACCTGCTTTGGAGGCCGTGT<br>3'-GTTTGACCCTGCCGGCCCTC    |
| <i>PDE5A</i> (human)         | NM_001083.3                  | 5'-TTAGCGGCTGCTGTGGTGCC<br>3'-GCCTGGCCGCTTTCCCCATT     |
| <i>PDE6A</i> (rhesus monkey) | XM_001107349.1               | 5'-ACCCTGGGAGGTGCAGAGCC<br>3'-GGAAAGGGTGGTGCCGTCCG     |

|                               |                |                                                                  |
|-------------------------------|----------------|------------------------------------------------------------------|
| <i>PDE7A</i> (human)          | NM_002604.2    | 5'-TCGCTCTTTGTGCCTCGCCA<br>3'-AGCTACCGCTCCTGGCCACT               |
| <i>PDE7B</i> (rhesus monkey)  | XM_001100632.1 | 5'-GGCCCAGAAGGTGTGCTGCC<br>3'-TCCAGCAGGTGGAGAGGGGC               |
| <i>PDE8A</i> (rhesus monkey)  | XM_001085852.1 | 5'-ACTGGAGGCTGCCACCCACA<br>3'-GAAGGCCAAGGCCGCATGGT               |
| <i>PDE8B</i> (rhesus monkey)  | XM_001101740.1 | 5'-TGTGCTGACGTGGCCAACCC<br>3'-AGAGGGCACCCACCAGCCAA               |
| <i>PDE9A</i> (human)          | NM_002606.2    | 5'-TCCGGCACTGCTTCTGCGTG<br>3'-TGTTGCACTCAGGCTCGGCG               |
| <i>PDE10A</i> (rhesus monkey) | XM_001105004.1 | 5'-AACCCCGCCTCATCCCTGCT<br>3'-CTGCCTCGGCTGACGATGGG               |
| <i>PDE11A</i> (rhesus monkey) | XM_001097498.1 | 5'-GCCGTGACCAAACCGTGGGA<br>3'-CAGTTGAGGCCAGCAGCCGT               |
| <i>18s-rRNA</i> (human)       | NR_003286.1    | 5'- CGG CTA CCA CAT CCA AGG AA<br>3'- GGG CCT CGA AAG AGT CCT GT |
| <i>RPS-10</i> (human)         | NM_001014.3    | 5'- AATGTGCCCAACCTTCATGTC<br>3'- TCCAGGCAAACCTGTTCTTCA           |
